# Supplementary material for: Mindfulness Versus Cognitive Reappraisal: the Impact of Mindfulness-Based Stress Reduction (MBSR) on the Early and Late Brain Potential Markers of Emotion Regulation
Source: Springer Nature journal article supplement (doi:10.1007/s12671-021-01692-8), 2021-07-22
Supplement: MOESM1 [file 19381924]

**Table 1.**

*The valence and arousal ratings for the IAPS slides used in the neutral conditions.*

|  | **Name** | **Slide number** | **Valence** | **Arousal** |
| --- | --- | --- | --- | --- |
| **Mindfulness block: Negative images** | | | | |
|  | snake | **1050** | 3.46 | 6.87 |
|  | spider | **1205** | 3.65 | 5.79 |
|  | insect | **1271** | 3.19 | 5.37 |
|  | dog | **1301** | 3.70 | 5.77 |
|  | bear | **1321** | 4.32 | 6.64 |
|  | shark | **1930** | 3.79 | 6.42 |
|  | person crying | **2141** | 2.44 | 5.00 |
|  | baby crying | **2457** | 3.20 | 4.94 |
|  | old man | **2490** | 3.32 | 3.95 |
|  | sad women | **2700** | 3.19 | 4.77 |
|  | dentist | **3280** | 3.72 | 5.39 |
|  | storm | **5973** | 3.51 | 5.78 |
|  | gun | **6200** | 2.71 | 6.21 |
|  | knife | **6555** | 3.33 | 5.69 |
|  | army | **6825** | 2.81 | 5.36 |
|  | gun | **6832** | 4.02 | 5.51 |
|  | police | **6834** | 2.91 | 6.28 |
|  | grave | **9001** | 3.10 | 3.67 |
|  | flowers | **9002** | 3.39 | 4.55 |
|  | drugs | **9007** | 2.49 | 5.03 |
|  | teeth | **9043** | 2.52 | 5.50 |
|  | rubbish | **9290** | 2.88 | 4.40 |
|  | army | **9403** | 3.51 | 5.62 |
|  | hostage | **9419** | 2.55 | 5.18 |
|  | terrorist | **9424** | 2.87 | 5.78 |
|  | terrorist | **9426** | 3.08 | 5.28 |
|  | army | **9429** | 2.68 | 5.63 |
|  | kid destroy | **9530** | 2.93 | 5.20 |
|  | ship | **9600** | 2.43 | 6.46 |
|  | fire | **9623** | 3.04 | 6.05 |
|  | cigs | **9830** | 2.54 | 4.86 |
|  | crash | **9900** | 2.46 | 5.58 |
|  | crash | **9902** | 2.33 | 6.00 |
|  | crash | **9920** | 2.50 | 5.76 |
|  | fire | **9925** | 2.84 | 5.59 |
|  |  |  |  |  |
| **Cognitive Reappraisal: Negative images** | | | | |
|  | snake | **1113** | 3.18 | 6.06 |
|  | spider | **1240** | 4.22 | 4.92 |
|  | dog | **1302** | 4.21 | 6.00 |
|  | shark | **1931** | 4.00 | 6.80 |
|  | angry man | **2120** | 3.34 | 5.18 |
|  | building | **9941** | 2.91 | 5.83 |
|  | scared baby | **2458** | 4.69 | 5.28 |
|  | riot | **2691** | 3.04 | 5.85 |
|  | drug | **2717** | 2.58 | 5.70 |
|  | ill man | **3220** | 2.49 | 5.52 |
|  | storm | **5961** | 3.52 | 5.80 |
|  | execution | **6020** | 3.41 | 5.58 |
|  | gun | **6244** | 3.09 | 5.68 |
|  | knife | **6510** | 2.46 | 6.96 |
|  | gun | **6562** | 3.19 | 5.08 |
|  | crime | **6830** | 2.82 | 6.21 |
|  | army | **6940** | 3.53 | 5.35 |
|  | crash | **7135** | 3.17 | 5.36 |
|  | bus | **7380** | 2.46 | 5.88 |
|  | boxer | **8231** | 3.77 | 5.24 |
|  | grave | **9000** | 2.55 | 4.06 |
|  | strange man | **9042** | 3.15 | 5.78 |
|  | army | **9160** | 3.23 | 5.87 |
|  | dead fish | **9171** | 4.01 | 4.72 |
|  | injured dog | **9184** | 2.47 | 5.75 |
|  | oil fire | **9230** | 3.89 | 5.77 |
|  | rubbish | **9291** | 2.93 | 4.38 |
|  | rubbish | **9295** | 2.39 | 5.11 |
|  | army | **9404** | 3.71 | 4.67 |
|  | army | **9409** | 3.34 | 5.61 |
|  | plane | **9610** | 2.89 | 5.23 |
|  | boat | **9620** | 2.70 | 6.11 |
|  | crash | **9912** | 3.46 | 4.68 |
|  | water | **9926** | 3.85 | 4.83 |
|  | boat | **9930** | 3.12 | 5.71 |
|  |  |  |  |  |
| **Expressive Suppression: Negative images** | | | | |
|  | snake | **1052** | 3.50 | 6.52 |
|  | spider | **1220** | 3.47 | 5.57 |
|  | insect | **1274** | 3.17 | 5.39 |
|  | dog | **1304** | 3.37 | 6.37 |
|  | mole | **1617** | 4.23 | 5.34 |
|  | shark | **1932** | 3.85 | 6.47 |
|  | old man | **2205** | 1.95 | 4.53 |
|  | sad boy | **2276** | 2.67 | 4.63 |
|  | army | **2683** | 2.62 | 6.21 |
|  | killing polar | **2688** | 2.73 | 5.98 |
|  | bomb | **2692** | 3.36 | 5.35 |
|  | drug inject | **2710** | 2.52 | 5.46 |
|  | drinking man | **2750** | 2.56 | 4.31 |
|  | crying boy | **2900.1** | 2.56 | 4.61 |
|  | infect eyes | **3160** | 2.63 | 5.35 |
|  | paramedic | **3216** | 3.28 | 5.37 |
|  | lava | **5920** | 5.16 | 6.23 |
|  | storm | **5972** | 3.85 | 6.34 |
|  | armed men | **6211** | 3.62 | 5.90 |
|  | armed man | **6213** | 2.91 | 5.86 |
|  | armed gang | **6242** | 2.69 | 5.43 |
|  | knife | **6300** | 2.59 | 6.61 |
|  | baseball bat | **6314** | 4.09 | 4.60 |
|  | car thief | **6571** | 2.85 | 5.59 |
|  | army | **9120** | 3.20 | 5.77 |
|  | destroyed | **9342** | 2.85 | 4.49 |
|  | army | **9427** | 2.89 | 5.50 |
|  | destroyed | **9470** | 3.05 | 5.05 |
|  | boat | **9621** | 3.22 | 5.76 |
|  | explosion | **9630** | 2.96 | 6.06 |
|  | car crash | **9905** | 2.55 | 5.93 |
|  | car fire | **9909** | 2.78 | 5.98 |
|  | care damage | **9911** | 2.03 | 5.76 |
|  | destroyed | **9922** | 2.78 | 5.21 |
|  | water | **9927** | 2.71 | 5.29 |
|  |  |  |  |  |

**Table 2.**

*The valence and arousal ratings for the IAPS slides used in the neutral conditions.*

|  | **Name** | **Slide number** | **Valence** | **Arousal** |
| --- | --- | --- | --- | --- |
| **Mindfulness block: Neutral images** | | | | |
|  | woman | 2513 | 4.82 | 3.40 |
|  | woman | 2036 | 5.80 | 3.24 |
|  | girl | 2440 | 4.49 | 2.63 |
|  | face | 2210 | 4.70 | 3.08 |
|  | man | 2220 | 5.03 | 3.63 |
|  | mother/son | 2435 | 5.84 | 3.94 |
|  | mushroom | 5534 | 4.84 | 3.14 |
|  | mushroom | 5520 | 5.33 | 2.95 |
|  | mug | 7009 | 4.93 | 3.01 |
|  | chess | 7512 | 5.38 | 3.72 |
|  | fork | 7080 | 5.27 | 2.32 |
|  | tool | 7056 | 5.07 | 3.07 |
|  | train | 7037 | 4.81 | 3.71 |
|  | fabric | 7160 | 5.02 | 3.07 |
|  | cabinet | 7705 | 4.77 | 2.65 |
|  | bridge | 7546 | 5.40 | 3.72 |
|  | food basket | 2980 | 5.61 | 3.09 |
|  | parrot | 1333 | 6.11 | 3.17 |
|  | shoes | 7031 | 4.52 | 2.03 |
|  | iron | 7030 | 4.69 | 2.99 |
|  | rubberbands | 7012 | 4.98 | 3.00 |
|  | clothes spin | 7045 | 5.33 | 3.01 |
|  | butcher | 2235 | 5.64 | 3.36 |
|  | secretary | 2383 | 4.72 | 3.41 |
|  | razor | 7016 | 4.76 | 3.40 |
|  | truck | 7130 | 4.77 | 3.35 |
|  | pony | 1595 | 6.22 | 4.79 |
|  | lizard | 1121 | 5.79 | 4.83 |
|  | resturant | 2039 | 3.65 | 3.46 |
|  | video | 7017 | 5.18 | 3.12 |
|  | reading | 2377 | 5.19 | 3.50 |
|  | lightbulb | 7055 | 4.90 | 3.02 |
|  | woman | 2400 | 4.49 | 2.63 |
|  | abstract art | 7185 | 4.97 | 2.64 |
|  | bird | 1560 | 5.97 | 5.51 |
|  |  |  |  |  |
| **Cognitive Reappraisal: Neutral images** | | | | |
|  | office | 7550 | 5.27 | 3.95 |
|  | paintbrush | 7509 | 6.03 | 3.43 |
|  | stairs | 7504 | 5.67 | 4.25 |
|  | lightbulb | 7236 | 5.64 | 3.79 |
|  | ironing board | 7234 | 4.23 | 2.96 |
|  | abstract art | 7187 | 5.07 | 2.30 |
|  | hammer | 7110 | 4.55 | 2.27 |
|  | car | 7096 | 5.54 | 3.98 |
|  | book | 7090 | 5.19 | 2.61 |
|  | cloths pegs | 7052 | 5.33 | 3.01 |
|  | shoes | 7038 | 4.82 | 3.01 |
|  | mug | 7035 | 4.98 | 2.66 |
|  | train | 7033 | 5.40 | 3.99 |
|  | picnic table | 7026 | 5.38 | 2.63 |
|  | spoon | 7004 | 5.04 | 2.00 |
|  | disk | 7003 | 5.00 | 3.07 |
|  | towel | 7002 | 4.97 | 3.16 |
|  | buttons | 7001 | 5.32 | 3.2 |
|  | mushroom | 5533 | 5.31 | 3.12 |
|  | mushroom | 5531 | 5.15 | 3.69 |
|  | shopping | 2745.1 | 5.31 | 3.26 |
|  | chess | 2580 | 5.71 | 2.79 |
|  | bakers | 2579 | 5.53 | 3.85 |
|  | couple | 2390 | 5.40 | 3.57 |
|  | artist | 2382 | 5.67 | 3.75 |
|  | woman | 2372 | 5.48 | 4.09 |
|  | woman | 2305 | 5.41 | 3.63 |
|  | man | 2214 | 5.01 | 3.46 |
|  | farmer | 2191 | 5.30 | 3.61 |
|  | neutral man | 2002 | 5.01 | 3.46 |
|  | crab | 1935 | 4.88 | 4.29 |
|  | camel | 1850 | 6.15 | 4.06 |
|  | bird | 1616 | 5.21 | 3.95 |
|  | pig | 1350 | 5.25 | 4.37 |
|  | turtle | 1945 | 4.59 | 4.42 |
|  |  |  |  |  |
| **Expressive Suppression: Neutral images** | | | | |
|  | woman | 2038 | 5.09 | 2.94 |
|  | woman | 2104 | 5.41 | 3.63 |
|  | girl | 2441 | 4.64 | 3.62 |
|  | face | 2200 | 4.79 | 3.18 |
|  | man | 2215 | 4.63 | 3.38 |
|  | mother/child | 2359 | 5.87 | 3.94 |
|  | mushroom | 5500 | 5.42 | 3.00 |
|  | mushroom | 5510 | 5.15 | 2.82 |
|  | bowl | 7006 | 4.88 | 2.33 |
|  | coffee cup | 7057 | 5.35 | 3.39 |
|  | chess | 2840 | 4.91 | 2.43 |
|  | hammer | 7034 | 4.95 | 3.06 |
|  | train | 7039 | 5.93 | 3.29 |
|  | scissors | 7014 | 5.15 | 3.25 |
|  | sewing | 7062 | 5.27 | 3.40 |
|  | office | 7700 | 4.25 | 2.95 |
|  | birds | 1419 | 6.54 | 3.38 |
|  | bridge | 7547 | 5.21 | 3.18 |
|  | stool | 7025 | 4.63 | 2.71 |
|  | shoes | 7032 | 4.82 | 3.18 |
|  | dustpan | 7040 | 4.69 | 2.69 |
|  | clothes rack | 7217 | 4.82 | 2.43 |
|  | fisherman | 2384 | 5.92 | 3.41 |
|  | medical worker | 2394 | 5.76 | 3.89 |
|  | hairdryer | 7050 | 4.93 | 2.75 |
|  | bus | 7140 | 5.50 | 2.92 |
|  | cow | 1670 | 6.81 | 3.05 |
|  | lizard | 1122 | 5.15 | 4.32 |
|  | shop | 2026 | 4.82 | 3.40 |
|  | reading | 2411 | 5.07 | 2.86 |
|  | clock | 7211 | 4.81 | 4.20 |
|  | lightbulb | 7170 | 5.14 | 3.21 |
|  | men resting | 2593 | 5.80 | 3.42 |
|  | abstract art | 7186 | 4.63 | 3.60 |
|  | bird | 1450 | 6.37 | 2.83 |

Data analysis scripts can be provided upon request to the corresponding author.
